# Supplementary material for: Knowledge of iatrogenic premature ovarian insufficiency among Chinese obstetricians and gynaecologists: a national questionnaire survey
Source: PubMed Central journal article supplement (PMC7677772; doi:10.1186/s13048-020-00739-z), 2020-11-18
Supplement: 13048_2020_739_MOESM1_ESM.pdf [file 13048_2020_739_MOESM1_ESM.pdf]

## QUESTIONNAIRE

### Part 1. General background information.

#### Q.1 Gender

- a) female    b) male

#### Q.2 Age (in years)

- a) 18~25    b) 26~35    c) 36~45    d) 46~55    e) >55

#### Q.3 Years of working

- a) ≤5    b) 6~10    c) 11~20    d) >20

#### Q.4 The level of hospital you are working in.

- a) Tertiary hospital    b) Secondary hospital  
c) Community hospital    d) Others \_\_\_\_\_

#### Q.4 The type of hospital you are working in.

- a) General hospital    b) Maternity and children hospital or reproductive hospital  
c) Tumour hospital    d) Others \_\_\_\_\_

#### Q.5 The type of specialty you are committed to.

- a) Gynaecologic endocrinologist or reproductive physician    b) Gynaecologist  
c) Obstetrician-gynaecologist    d) Obstetrician    e) Gynaecologic oncologist

### Part 2. Do you think the following tumour treatments can cause premature ovarian insufficiency?

#### Q.6 Chemotherapy    a) Yes    b) No

#### Q.7 Radiotherapy    a) Yes    b) No

**Q.8 Tumour immunotherapy** a) Yes b) No

**Q.9 Tumour-targeting therapy** a) Yes b) No

**Part 3. Do you think the following surgeries or procedures can cause premature ovarian insufficiency?**

**Q.10 Ovarian cystectomy** a) Yes b) No

**Q.11 Hysterectomy with bilateral salpingectomy** a) Yes b) No

**Q.12 Bilateral salpingectomy** a) Yes b) No

**Q.13 Bilateral tubal ligation** a) Yes b) No

**Q.15 Uterine artery embolisation** a) Yes b) No

**Part 4. Immunosuppressants.**

**Q.16 Do you think immunosuppressants can cause premature ovarian insufficiency?**

a) Yes b) No
